# Supplementary material for: Sustainable solvents for β-diketone extraction from wheat straw wax and their molecular self-assembly into nano-structured tubules for hydrophobic coatings
Source: Royal Society of Chemistry journal article supplement (doi:10.1039/d2ra07581d), 2023-01-01
Supplement: d2ra07581d1.pdf [file d2ra07581d1.pdf]

**Electronic Supplementary Information (ESI)**

**Bio-based solvents as greener solvents replacement for hazardous  
hydrocarbon solvents for lipophilic  $\beta$ -diketone extraction from  
wheat straw wax**

Pakin Noppawan<sup>a</sup>, Suwiwat Sangon<sup>b</sup>, Petcharaphorn Chatsiri<sup>c</sup>, Nutnicha Khunmood<sup>d</sup>,  
Suphatta Aintharabunya<sup>b</sup>, Nontipa Supanchaiyamat<sup>b</sup>, and Andrew J. Hunt<sup>b,\*</sup>

<sup>a</sup> Department of Chemistry, Faculty of Science, Mahasarakham University, Maha Sarakham, 44150, Thailand.

<sup>b</sup> Materials Chemistry Research Center, Department of Chemistry and Center of Excellence for Innovation in Chemistry, Faculty of Science, Khon Kaen University, Khon Kaen, 40002, Thailand.

<sup>c</sup> Vidyasirimedhi Institute of Science and Technology (VISTEC), Rayong, 21210, Thailand.

<sup>d</sup> Agilent Technologies, 22<sup>nd</sup> Floor, U Chu Liang Bldg, Rama IV Road, Bangrak, Bangkok, 10500, Thailand.

\*Corresponding author: [andrew@kku.ac.th](mailto:andrew@kku.ac.th)

## Contents

|          |                                                                                                                               |
|----------|-------------------------------------------------------------------------------------------------------------------------------|
| Page S3  | Figure S1 The extraction procedure of the extraction of hentriacontane-14,16-dione from wheat straw wax                       |
| Page S3  | Scheme S1 Formation of Cu(II) $\beta$ -diketone complex and subsequent recovery of the $\beta$ -diketone                      |
| Page S4  | Table S1 Optimization results of hentriacontane-14,16-dione extraction from wheat straw wax with the extraction time = 20 min |
| Page S5  | Figure S2 $^1\text{H}$ NMR spectrum of hentriacontane-14,16-dione                                                             |
| Page S5  | Figure S3 $^{13}\text{C}$ NMR spectrum of hentriacontane-14,16-dione                                                          |
| Page S6  | Figure S4 IR spectrum of hentriacontane-14,16-dione                                                                           |
| Page S6  | Figure S5 GC-FID chromatogram of the hentriacontane-14,16-dione                                                               |
| Page S6  | Figure S6 GC-MS chromatogram of the hentriacontane-14,16-dione                                                                |
| Page S7  | Figure S7 GC-MS of the hentriacontane-14,16-dione                                                                             |
| Page S7  | Figure S8 A proposed fragmentation scheme of the 14,16-hentriacontanedione (part 1)                                           |
| Page S8  | Figure S9 A proposed fragmentation scheme of the 14,16-hentriacontanedione (part 2)                                           |
| Page S9  | Green chemistry metrics analysis                                                                                              |
| Page S14 | Table S2 Kamlet–Taft parameter of a combined measure of dipolarity and polarizability ( $\pi^*$ ) of solvents                 |
| Page S14 | Table S3 Contact angle of water on glass slide without wheat straw wax or diketone modification                               |
| Page S14 | References                                                                                                                    |

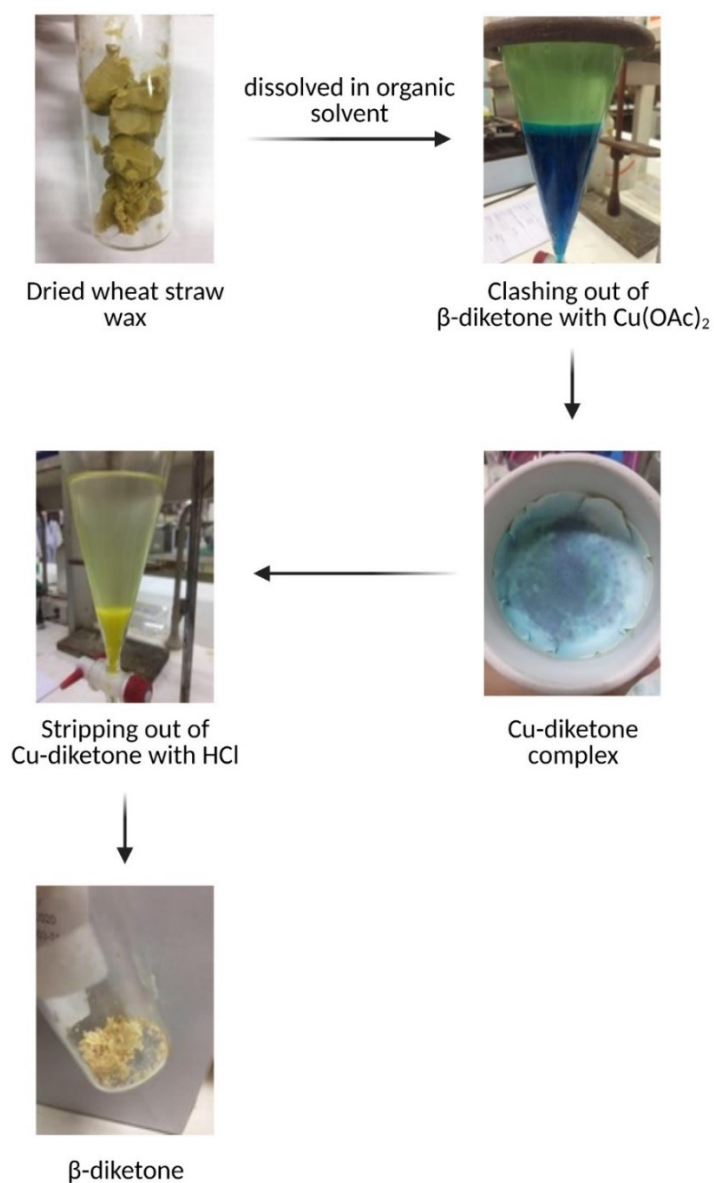

**Figure S1** The extraction procedure of the extraction of hentriacontane-14,16-dione from wheat straw wax

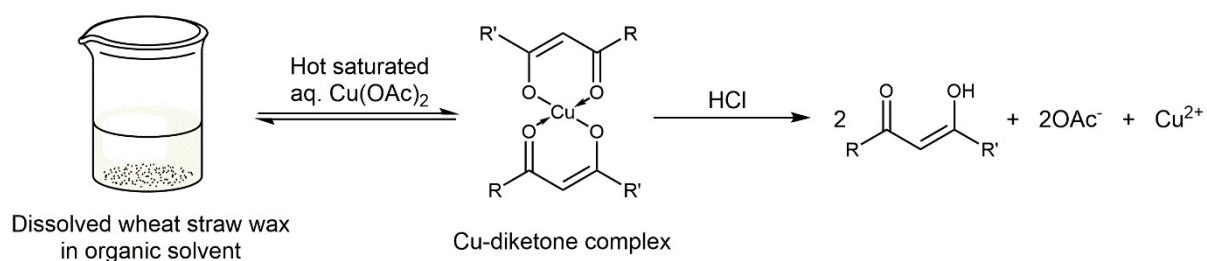

**Scheme S1** Formation of  $\text{Cu}(\text{II})$   $\beta$ -diketone complex and subsequent recovery of the  $\beta$ -diketone

**Table S1** Optimization results of hentriacontane-14,16-dione extraction from wheat straw wax with the extraction time = 20 min

| Solvent         | Ratio of wax (g) to solvent (mL) |      |       |       |       | Precipitation temp. |               |   | Recovery yield of $\beta$ -diketone (wt%) |
|-----------------|----------------------------------|------|-------|-------|-------|---------------------|---------------|---|-------------------------------------------|
|                 | 1:30                             | 1:60 | 1:100 | 1:150 | 1:300 | Room temperature    | In fridge (h) |   |                                           |
|                 |                                  |      |       |       |       |                     | 2             | 4 |                                           |
| Petroleum ether | -                                | -    | -     | -     | ✓     | ✓                   | -             | - | 12.12                                     |
|                 | -                                | -    | -     | -     | ✓     | -                   | ✓             | - | 18.02                                     |
|                 | -                                | -    | -     | -     | ✓     | -                   | -             | ✓ | 19.62                                     |
|                 | ✓                                | -    | -     | -     | -     | -                   | -             | ✓ | 24.37                                     |
| Toluene         | -                                | -    | -     | -     | ✓     | ✓                   | -             | - | -                                         |
|                 | -                                | -    | -     | -     | ✓     | -                   | ✓             | - | 15.94                                     |
|                 | -                                | -    | -     | -     | ✓     | -                   | -             | ✓ | 29.01                                     |
|                 | ✓                                | -    | -     | -     | -     | -                   | -             | ✓ | 21.93                                     |
| TMO             | -                                | -    | -     | -     | ✓     | -                   | -             | ✓ | 21.26                                     |
|                 | -                                | -    | -     | ✓     | -     | -                   | -             | ✓ | 20.37                                     |
|                 | -                                | -    | ✓     | -     | -     | -                   | -             | ✓ | 23.69                                     |
|                 | -                                | ✓    | -     | -     | -     | -                   | -             | ✓ | 20.38                                     |
|                 | ✓                                | -    | -     | -     | -     | -                   | -             | ✓ | 21.80                                     |
| DEDMO           | ✓                                | -    | -     | -     | -     | -                   | -             | ✓ | 23.70                                     |

<sup>b</sup>Standard deviation less than 0.5%.

2555\_Htd1.1.fid  
2555\_Htd1

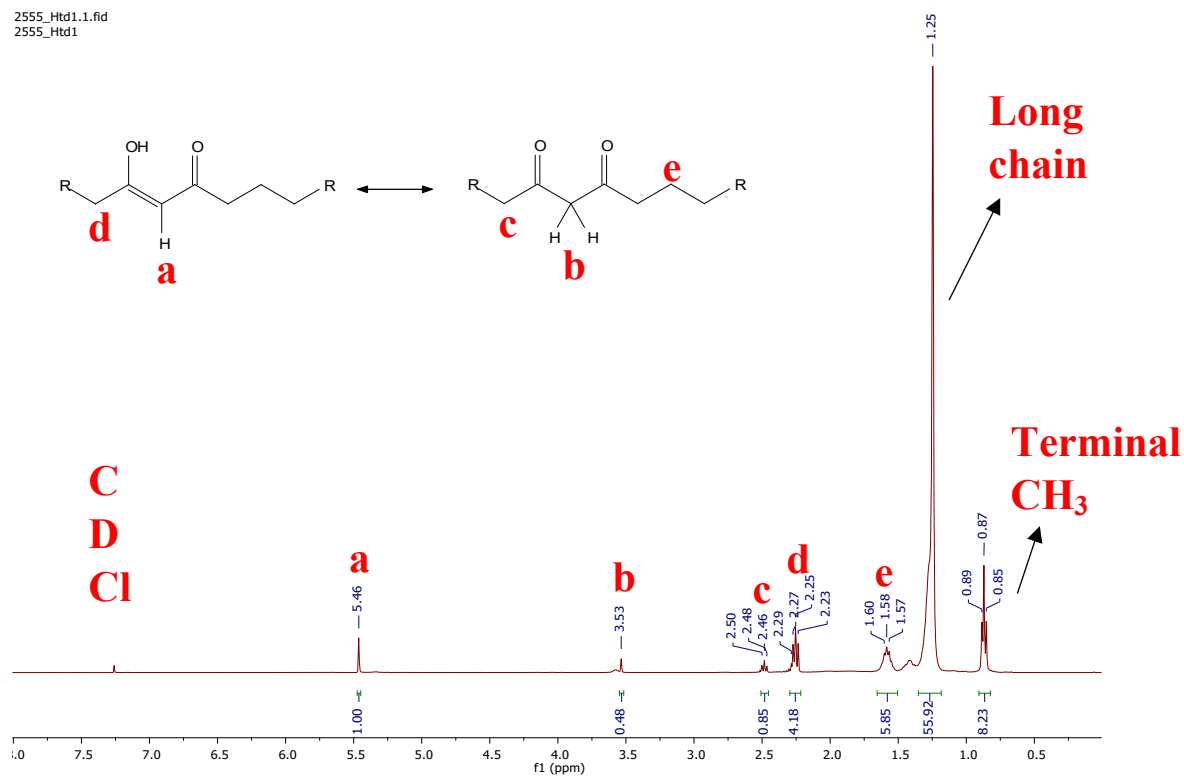

Figure S2 <sup>1</sup>H NMR spectrum of hentriacontane-14,16-dione

3299\_Htd4\_Tol\_C.2.fid  
3299\_Htd4\_Tol\_C

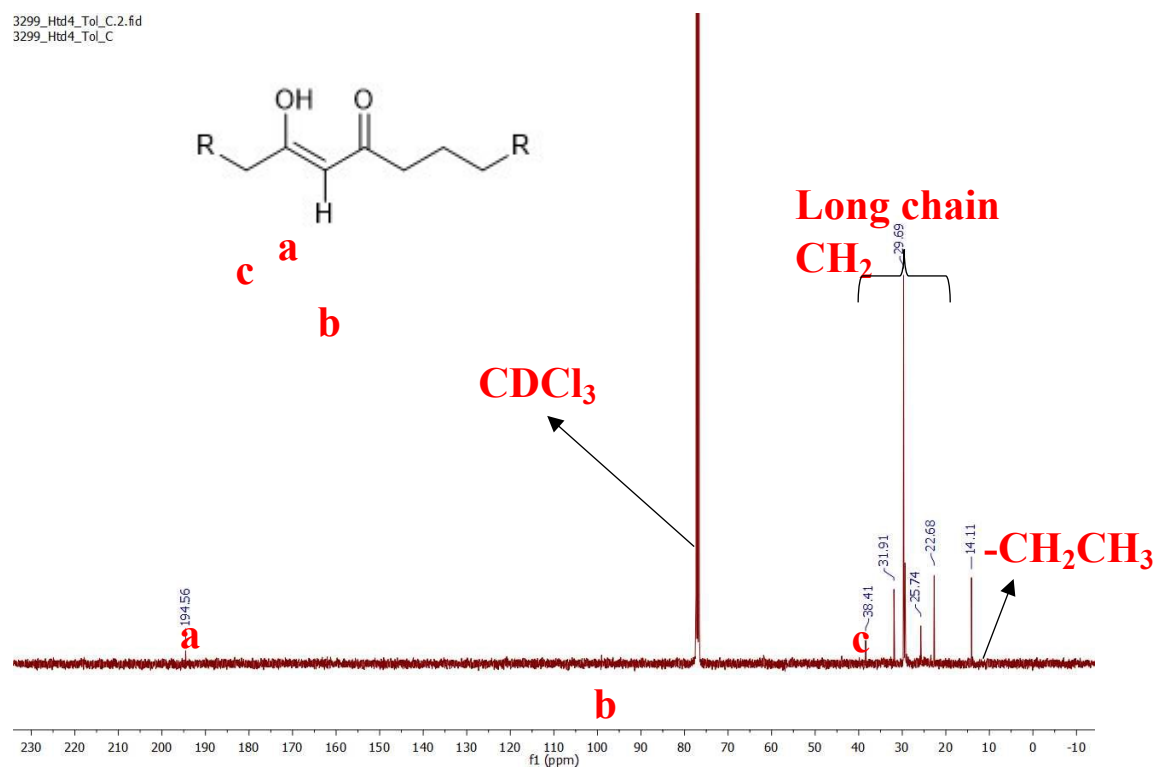

Figure S3 <sup>13</sup>C NMR spectrum of hentriacontane-14,16-dione

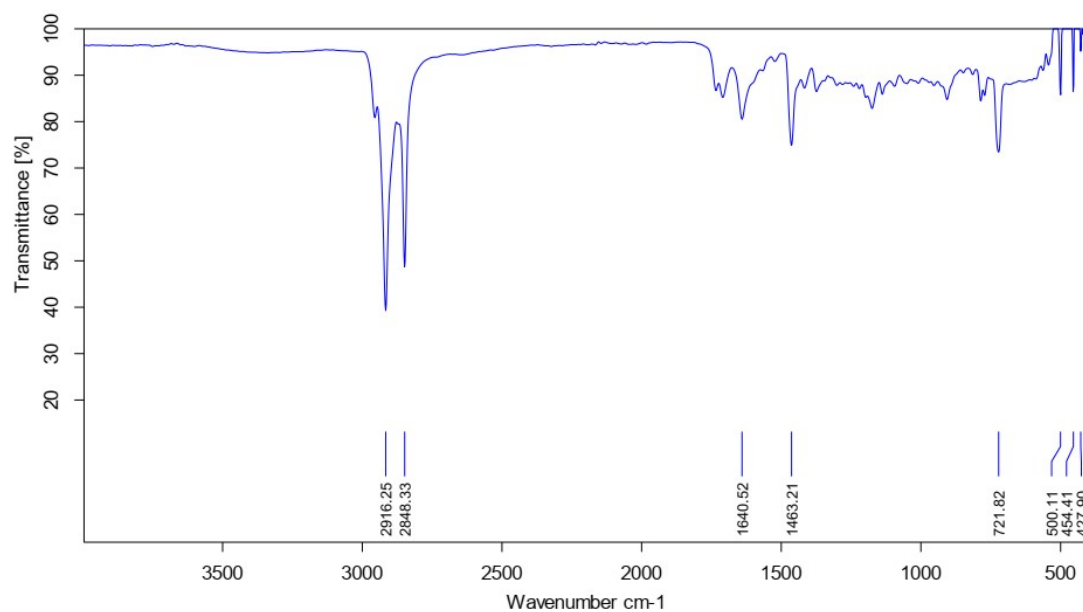

**Figure S4** IR spectrum of hentriacontane-14,16-dione

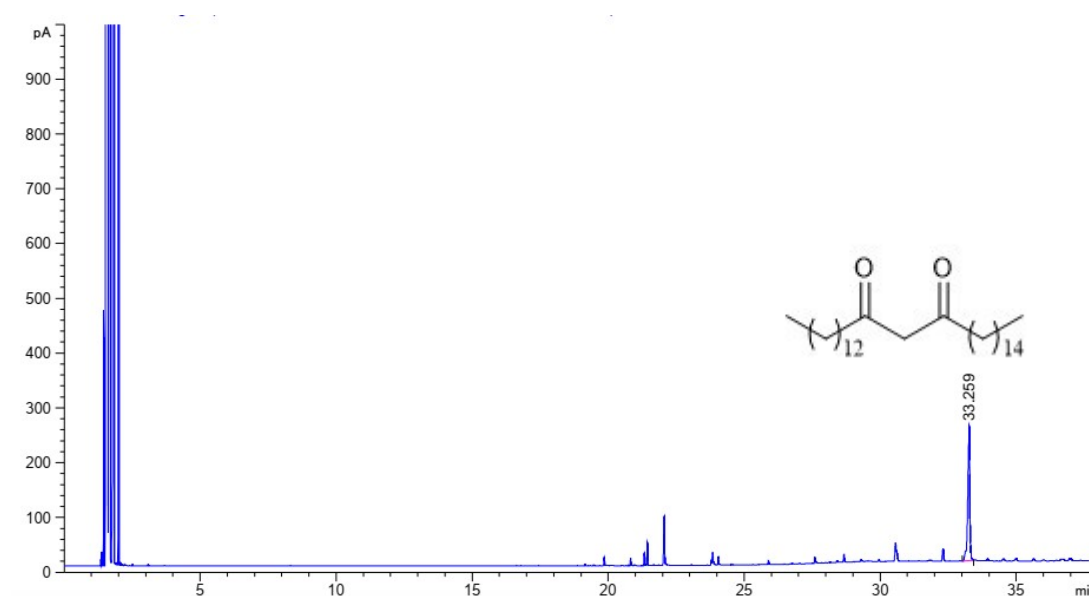

**Figure S5** GC-FID chromatogram of the hentriacontane-14,16-dione

**Figure S6** GC-MS chromatogram of the hentriacontane-14,16-dione

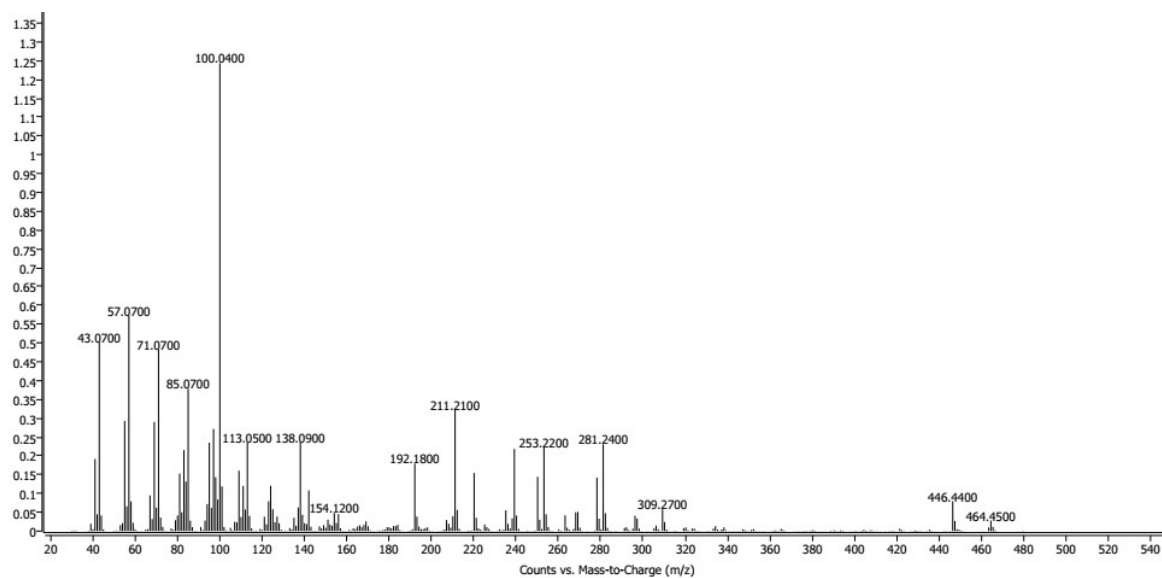

**Figure S7** GC-MS of the hentriacontane-14,16-dione

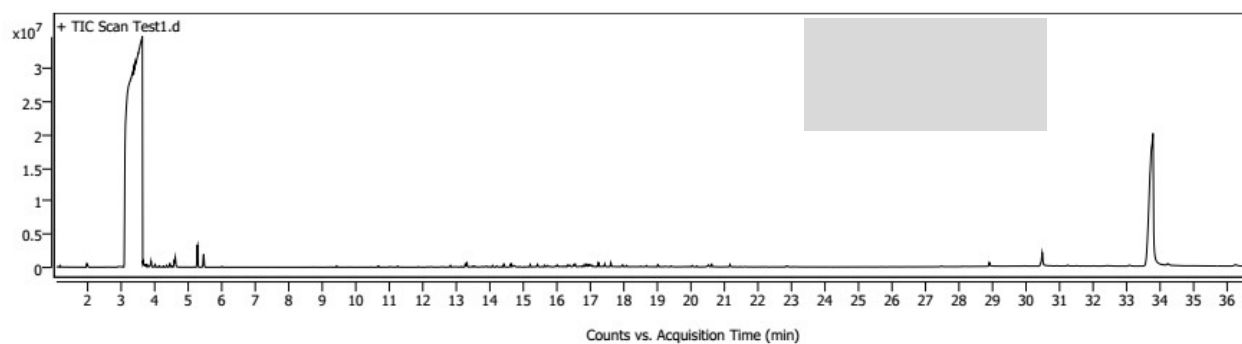

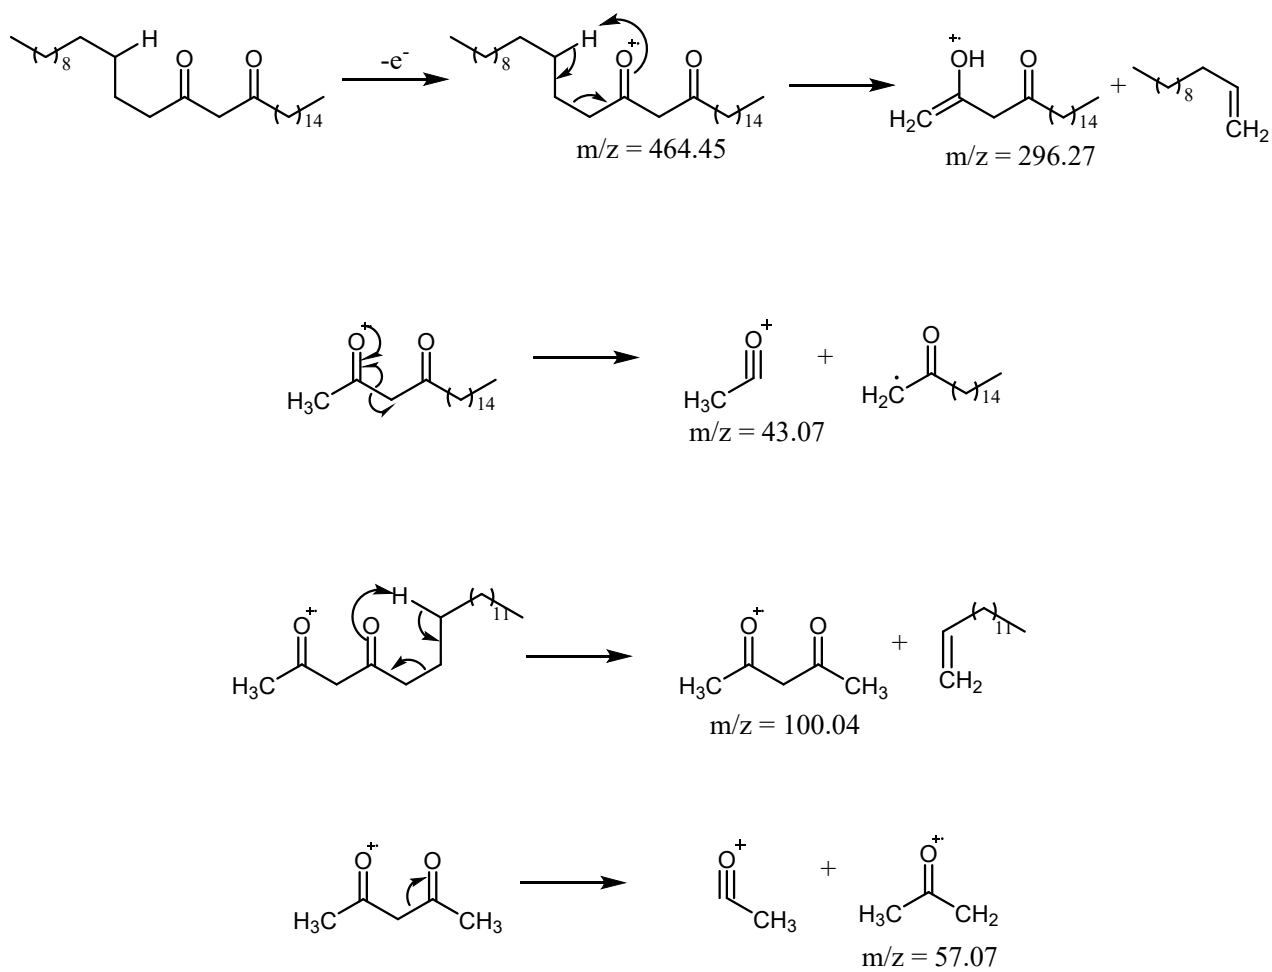

**Figure S8** A proposed fragmentation scheme of the 14,16-hentriacontanedione (part 1)

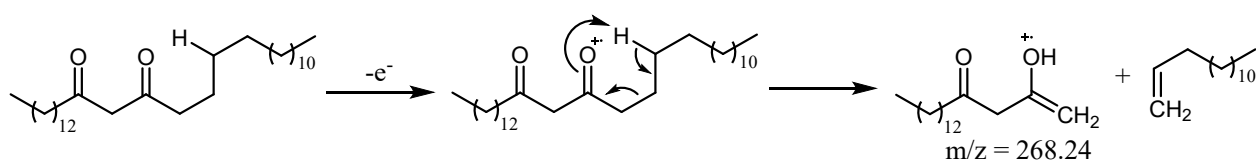

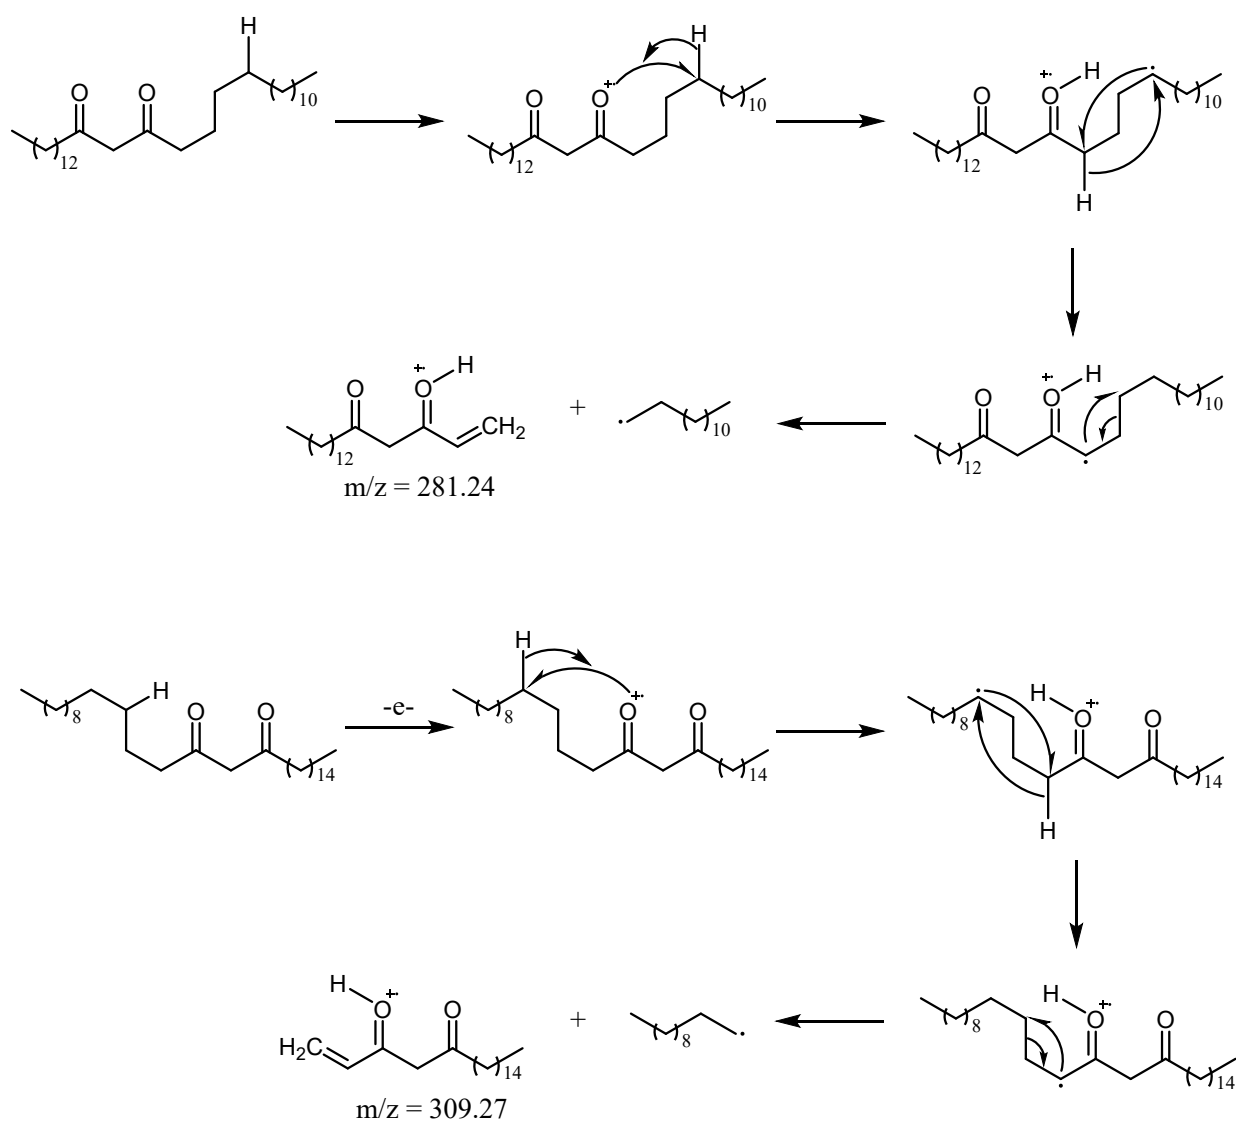

**Figure S9** A proposed fragmentation scheme of the 14,16-hentriacontanedione (part 2)

## Green chemistry metrics analysis

The following formulae were used for calculating Process Mass Intensity (PMI), E-factor, Solvent and Water Intensity (SI and WI).<sup>1-13</sup>

$$\text{PMI} = \frac{\text{Total mass of input material in the whole process}}{\text{Mass of product}}$$

$$\text{E Factor} = \text{PMI} - 1$$

$$\text{SI} = \frac{\text{Total mass of solvents excl. water in the whole process}}{\text{Mass of product}}$$

$$\text{WI} = \frac{\text{Total mass of water used in the whole process}}{\text{Mass of product}}$$

Previous report, Process A<sup>14</sup>

Reported procedures for process A do not always contain all the required information; therefore, some realistic assumptions were used where appropriate and are italicized in the calculations given below.

Experimental procedures: 1 g of wheat straw wax was crushed with a spatula in a beaker and dissolved in 200 mL of solvent. The mixture was stirred at room temperature for 30 min and transferred to a separatory funnel, followed by the addition of 100 mL hot excess saturated aqueous  $\text{Cu}(\text{OAc})_2$ . Then the mixture was shaken for 20 min and allowed to stand for 1 hour. The organic phase becomes green, while the aqueous phase becomes light blue with a dark blue of Cu-diketones in between the two phases. The system was heated with a heat-gun to afford proper separation. The organic phase was collected and kept for 2 hours at room temperature. The precipitate was then filtered and washed with 5 mL of extraction solvent. The copper salt was re-dissolved in 100 mL of hot chosen solvent and transferred to a separating flask followed by the addition of 2 mL of hydrochloric acid. The mixture was shaken for 10 min to strip out the Cu(II) ions from hentriacontane-14,16-dione in the organic phase and washed with 100 mL deionized distilled water. The product was recovered from the organic layer by removing the solvent under a vacuum in a rotary evaporator.

Materials used for metrics calculations: wheat straw wax (1g), petroleum ether (A1, 305 mL, 199.2 g), cyclohexane (A2, 305 mL, 237.6 g), p-cymene (A3, 305 mL, 261.4 g), CPME (A4, 305 mL, 263.2),  $\text{Cu}(\text{OAc})_2$  (10 g), HCl (2 mL, 2.4 g), water (200 mL, 200 g), product A1 (0.18 g), product A2 (0.06 g), product A3 (0.082 g), product A4 (0.078 g)

#### **Petroleum ether (process A1)**

$$\text{PMI} = \frac{199.2 + 10 + 2.4 + 200}{0.18} = 2292$$

$$\text{E Factor} = 2292 - 1 = 2291$$

$$\text{SI} = \frac{199.2}{0.18} = 1106$$

$$\text{WI} = \frac{200}{0.18} = 1111$$

**Cyclohexane (process A2)**

$$\text{PMI} = \frac{237.6 + 10 + 2.4 + 200}{0.06} = 7516$$

$$\text{E Factor} = 7516 - 1 = 7515$$

$$\text{SI} = \frac{237.6}{0.06} = 3960$$

$$\text{WI} = \frac{200}{0.06} = 3333$$

**p-Cymene (process A3)**

$$\text{PMI} = \frac{261.4 + 10 + 2.4 + 200}{0.082} = 5790$$

$$\text{E Factor} = 5790 - 1 = 5789$$

$$\text{SI} = \frac{261.4}{0.082} = 3188$$

$$WI = \frac{200}{0.082} = 2439$$

**CPME (process A4)**

$$PMI = \frac{263.2 + 10 + 2.4 + 200}{0.078} = 6110$$

$$E \text{ Factor} = 6110 - 1 = 6109$$

$$SI = \frac{263.2}{0.078} = 3375$$

$$WI = \frac{200}{0.078} = 2564$$

#### **Current work (This work)**

Experimental procedures: 1 g of wheat straw wax was crushed with a spatula in a beaker and dissolved in 20 mL of solvent. The mixture was stirred at room temperature for 30 min and transferred to a separatory funnel, followed by the addition of 10 mL hot excess saturated aqueous  $\text{Cu}(\text{OAc})_2$ . Then the mixture was shaken for 20 min and allowed to stand for 1 hour. The organic phase becomes green, while the aqueous phase become light blue with a dark blue of Cu-diketones in between the two phases. The system was heated with a heat-gun to afford proper separation. The organic phase was collected and kept for 2 hours at room temperature followed by kept in the refrigerator for 4 hours for the complete crashing of Cu-diketones. The precipitate was then filtered and washed with 5 mL of extraction solvent. The copper salt was re-dissolved in 10 mL of hot chosen solvent and transferred to a separating flask followed by the addition of 0.2 mL of hydrochloric acid. The mixture was shaken for 10 min to strip out the Cu(II) ions from hentriacontane-14,16-dione in the organic phase and

washed with 10 mL deionized distilled water. The product was recovered from the organic layer by removing the solvent under a vacuum in a rotary evaporator.

Materials used for metrics calculations: wheat straw wax (1g), petroleum ether (B1, 35 mL, 22.9 g), toluene (B2, 35 mL, 30.3 g), TMO (B3, 35 mL, 28.1 g), DEDMO (B4, 35 mL, 29.3), Cu(OAc)<sub>2</sub> (1 g), HCl (0.2 mL, 0.2 g), water (20 mL, 20 g), product B1 (0.244 g), product B2 (0.219 g), product B3 (0.218 g), product B4 (0.237 g)

**Petroleum ether (process B1)**

$$\text{PMI} = \frac{22.9 + 1 + 0.2 + 20}{0.244} = 185$$

$$\text{E Factor} = 185 - 1 = 184$$

$$\text{SI} = \frac{22.9}{0.244} = 94$$

$$\text{WI} = \frac{20}{0.244} = 82$$

**Cyclohexane (process B2)**

$$\text{PMI} = \frac{30.3 + 1 + 0.2 + 20}{0.219} = 240$$

$$\text{E Factor} = 240 - 1 = 239$$

$$\text{SI} = \frac{30.3}{0.219} = 139$$

$$WI = \frac{20}{0.219} = 91$$

**TMO (process B3)**

$$PMI = \frac{28.1 + 1 + 0.2 + 20}{0.218} = 231$$

$$E \text{ Factor} = 231 - 1 = 230$$

$$SI = \frac{28.1}{0.218} = 129$$

$$WI = \frac{20}{0.218} = 92$$

**DEDMO (process B4)**

$$PMI = \frac{29.3 + 1 + 0.2 + 20}{0.237} = 217$$

$$E \text{ Factor} = 217 - 1 = 216$$

$$SI = \frac{29.3}{0.237} = 124$$

$$WI = \frac{20}{0.237} = 84$$

**Table S2** Kamlet–Taft parameter of a combined measure of dipolarity and polarizability ( $\pi^*$ ) of solvents

| Solvent         | $\pi^*$               |
|-----------------|-----------------------|
| Petroleum ether | -0.16 <sup>#</sup>    |
| Toluene         | 0.51 <sup>15,16</sup> |

|       |                       |
|-------|-----------------------|
| TMO   | 0.35 <sup>15,16</sup> |
| DEDMO | 0.31 <sup>16</sup>    |

# This work

**Table S3** Contact angle of water on glass slide without wheat straw wax or  $\beta$ -diketone modification

| Contact angle (degree) | Standard deviation | Picture                                                                             |
|------------------------|--------------------|-------------------------------------------------------------------------------------|
| 59.32                  | 0.42               | 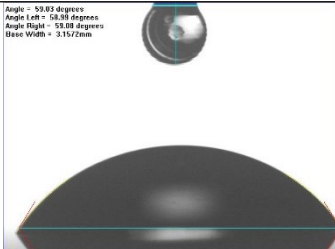 |

## References

- 1 C. R. McElroy, A. Constantinou, L. C. Jones, L. Summerton and J. H. Clark, *Green Chem.*, 2015, **17**, 3111–3121.
- 2 F. Roschangar, R. A. Sheldon and C. H. Senanayake, *Green Chem.*, 2015, **17**, 752–768.
- 3 C. Jimenez-Gonzalez, C. S. Ponder, Q. B. Broxterman and J. B. Manley, *Org. Process Res. Dev.*, 2011, **15**, 912–917.
- 4 C. Jiménez-González, D. J. C. Constable and C. S. Ponder, *Chem. Soc. Rev.*, 2012, **41**, 1485–1498.
- 5 J. Augé, *Green Chem.*, 2008, **10**, 225–231.
- 6 J. Andraos, *Org. Process Res. Dev.*, 2005, **9**, 149–163.
- 7 D. J. C. Constable, A. D. Curzons and V. L. Cunningham, *Green Chem.*, 2002, **4**, 521–527.
- 8 X. Zhang, X. Ma, W. Qiu, J. Evans and W. Zhang, *Green Chem.*, 2019, **21**, 349–354.
- 9 A. Muthengi, X. Zhang, G. Dhawan, W. Zhang, F. Corsini and W. Zhang, *Green Chem.*, 2018, **20**, 3134–3139.
- 10 S. Abou-Shehadeh, P. Mampuy, B. U. W. Maes, J. H. Clark and L. Summerton, *Green Chem.*, 2017, **19**, 249–258.
- 11 N. J. Willis, C. A. Fisher, C. M. Alder, A. Harsanyi, L. Shukla, J. P. Adams and G. Sandford, *Green Chem.*, 2016, **18**, 1313–1318.
- 12 T. V. T. Phan, C. Gallardo and J. Mane, *Green Chem.*, 2015, **17**, 2846–2852.
- 13 P. Noppawan, S. Sangon, N. Supanchaiyamat and A. J. Hunt, *Green Chem.*, , DOI:10.1039/D1GC00872B.
- 14 K. Asemave, phd, University of York, 2016.
- 15 F. Byrne, B. Forier, G. Bossaert, C. Hoebers, T. J. Farmer, J. H. Clark and A. J. Hunt, *Green Chem.*, 2017, **19**, 3671–3678.
- 16 P. Noppawan, S. Sangon, N. Supanchaiyamat, J. Sherwood and A. J. Hunt, *ACS Sustainable Chem. Eng.*, 2022, **10**, 4486–4493.
